# Supplementary material for: Technical Note: A new approach to discriminate different black carbon sources by utilising fullerenes and metals in Positive Matrix Factorisation analysis of High-Resolution Soot Particle Aerosol Mass Spectrometer data
Source: Copernicus journal article supplement (doi:10.5194/acp-2020-890), 2020-10-01
Supplement: Supplementary file 1 [file acp-2020-890-supplement.pdf]

## Supplementary Materials

|                                     |                                                          |                                                                                              |
|-------------------------------------|----------------------------------------------------------|----------------------------------------------------------------------------------------------|
| <b>FamilyCx (rBC<sup>1</sup>)</b>   | Refractory Black Carbon                                  | Measured from HR-SP-AMS                                                                      |
| <b>BC (AE31)<sup>2</sup></b>        | Black Carbon                                             | Measured from Aethalometer AE31                                                              |
| <b>BrC (AE31)<sup>2</sup></b>       | Brown Carbon                                             | Measured from Aethalometer AE31                                                              |
| <b>BC<sub>total</sub></b>           | Total BC from AE31 (BC <sub>tr</sub> +BC <sub>wb</sub> ) |                                                                                              |
| <b>BC<sub>tr</sub></b>              | Black Carbon (traffic emissions)                         | Measured from Aethalometer AE31                                                              |
| <b>BC<sub>wb</sub></b>              | Black Carbon (Wood Burning)                              | Measured from Aethalometer AE31                                                              |
| <b>HONO<sup>3</sup></b>             | Nitrous Acid                                             | Measured from ToF-CIMS                                                                       |
| <b>HCN<sup>3</sup></b>              | Hydrogen Cyanide                                         | Measured from ToF-CIMS                                                                       |
| <b>HCNO<sup>3</sup></b>             | Isocyanic Acid                                           | Measured from ToF-CIMS                                                                       |
| <b>Fullerenes<sup>1</sup></b>       | Fullerenes                                               | Measured from HR-SP-AMS from HR-SP-AMS                                                       |
| <b>BC and HULIS<sup>1</sup></b>     | HULIS                                                    | Measured from HR-SP-AMS from HR-SP-AMS                                                       |
| <b>pPON<sup>2</sup></b>             | Primary Particulate Nitrate                              | Organic Measured by Aerosol Mass Spectrometer (AMS) by using 46:30 ratio (Reyes et al, 2018) |
| <b>sPON<sup>2</sup></b>             | Secondary Particulate Nitrate                            | Organic Measured by Aerosol Mass Spectrometer (AMS) by using 46:30 ratio.                    |
| <b>HOA<sup>3</sup></b>              | Hydrocarbon-like Organic Aerosol                         | Factor derived by PMF analysis from HR-SP-AMS                                                |
| <b>BBOA<sup>1</sup></b>             | Biomass Burning Organic Aerosol                          | Factor derived by PMF analysis from HR-SP-AMS                                                |
| <b>Sr<sup>1</sup></b>               | Strontium Metal                                          | Measured from HR-SP-AMS                                                                      |
| <b>Domestic Burning<sup>1</sup></b> | Domestic burning                                         | Factor derived by PMF analysis from HR-SP-AMS                                                |

<sup>1</sup>rBC, Sr, Fullerenes, Hydrocarbon-like OA, Domestic burning, BBOA, BC and HULIS (Current Case study) **derived by PMF from HR-SP-AMS**

<sup>2</sup>pPON, sPON, BC and BrC (AE31) (Reyes et al, 2018)

<sup>3</sup>HCN, HCNO, HONO (Priestley et al, 2018)

### 9.1 Positive Matrix Factorisation

A range of solutions were obtained using different parameters as part of the PMF analysis and here we present the reasons behind the choice of solution used in the paper. Regarding the number of factors, a 5-factor solution was chosen instead of 6-factor solution because all the five factors are separated from one another and represent a specific soot source (fig S1a, b). In comparison, the 6-factor solution has two ‘split’ factors representing the same emissions. These are factor 2 and factor 4 in figure S2 and represent domestic wood burning sources because their peaks were evident before and after the bonfire night event (fig. S2a, S2b).

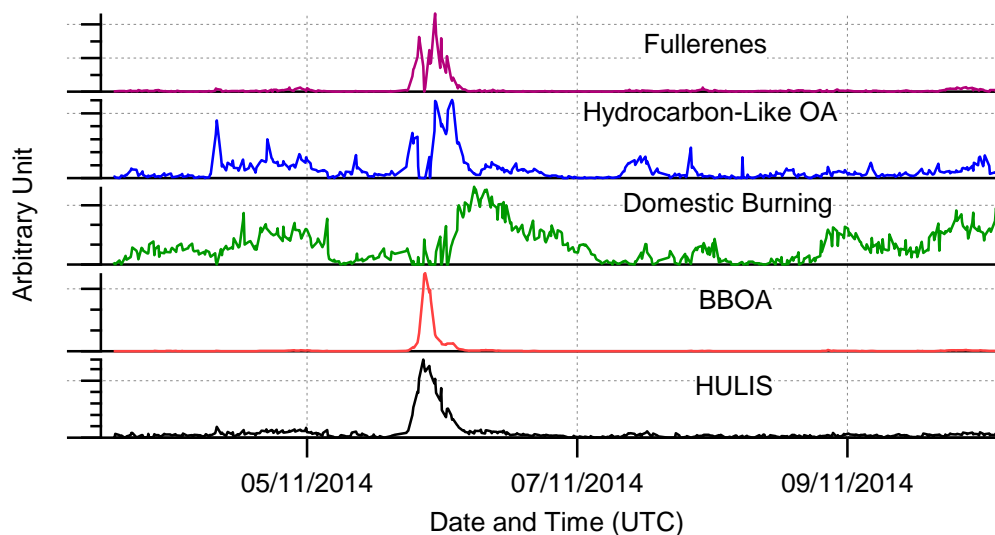

Figure S1a: Time series of five factors solution detected separately under the condition of 0.10 model error.

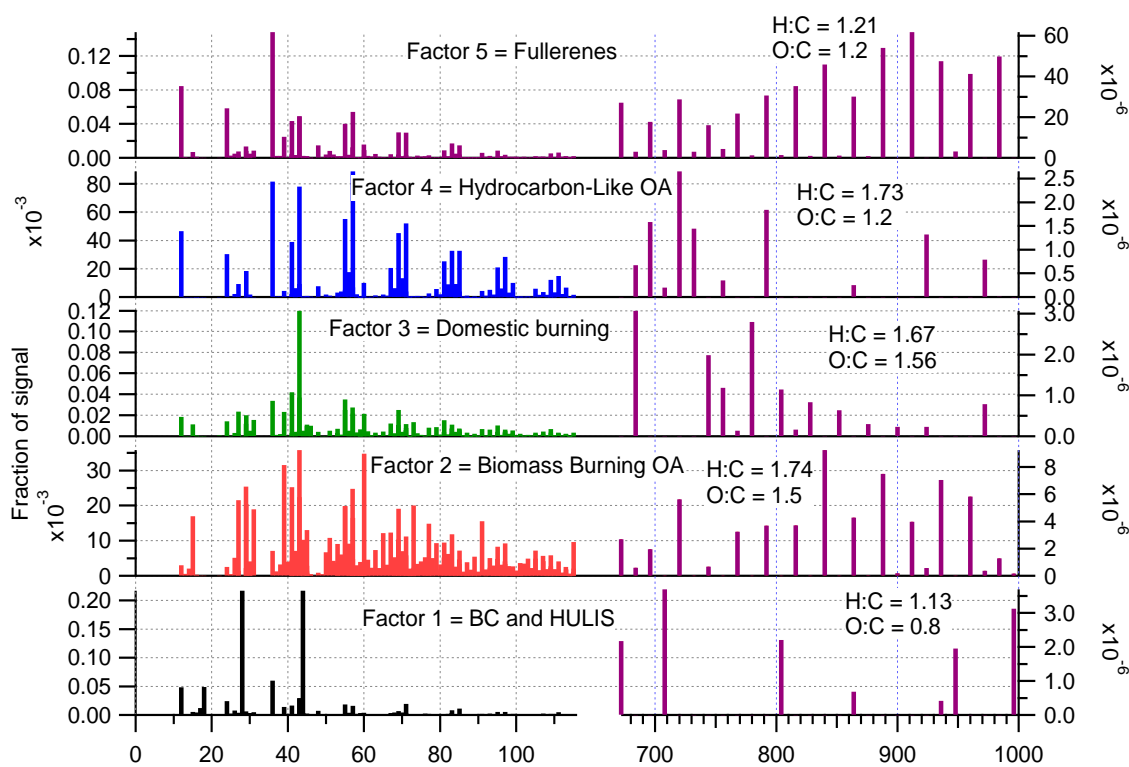

Figure S1b: The factor profile of five factors solution detected separately under the condition of 0.10 model error.

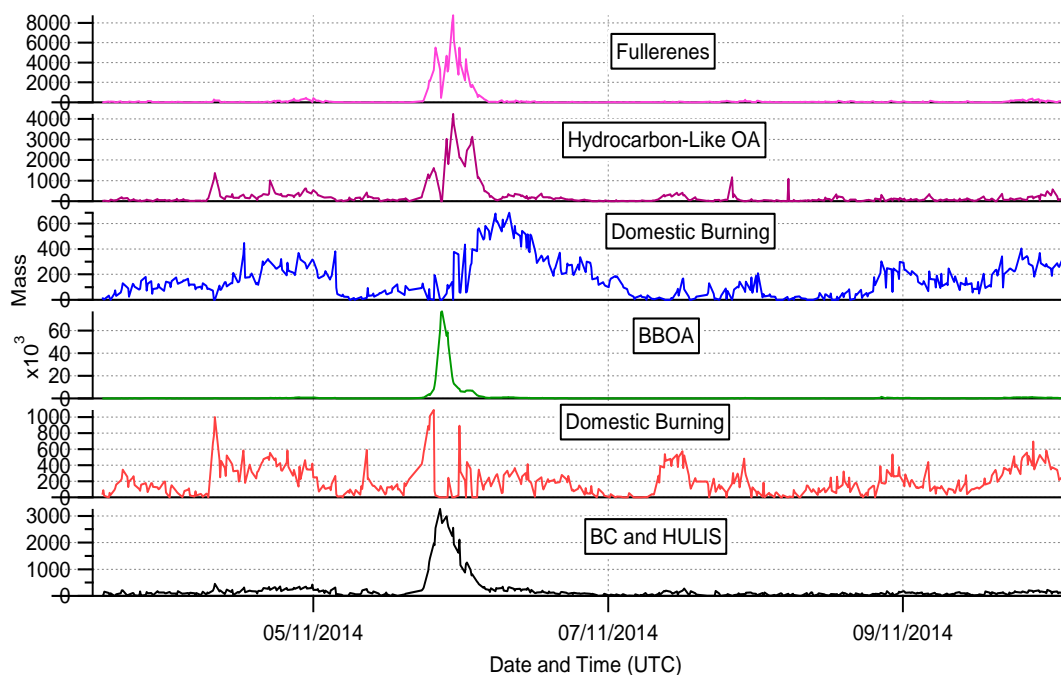

**Figure S2a: Time series of six factors solution in which two same factors are split in to two different factors i.e. 2 and 4 under the condition of 0.10 model error.**

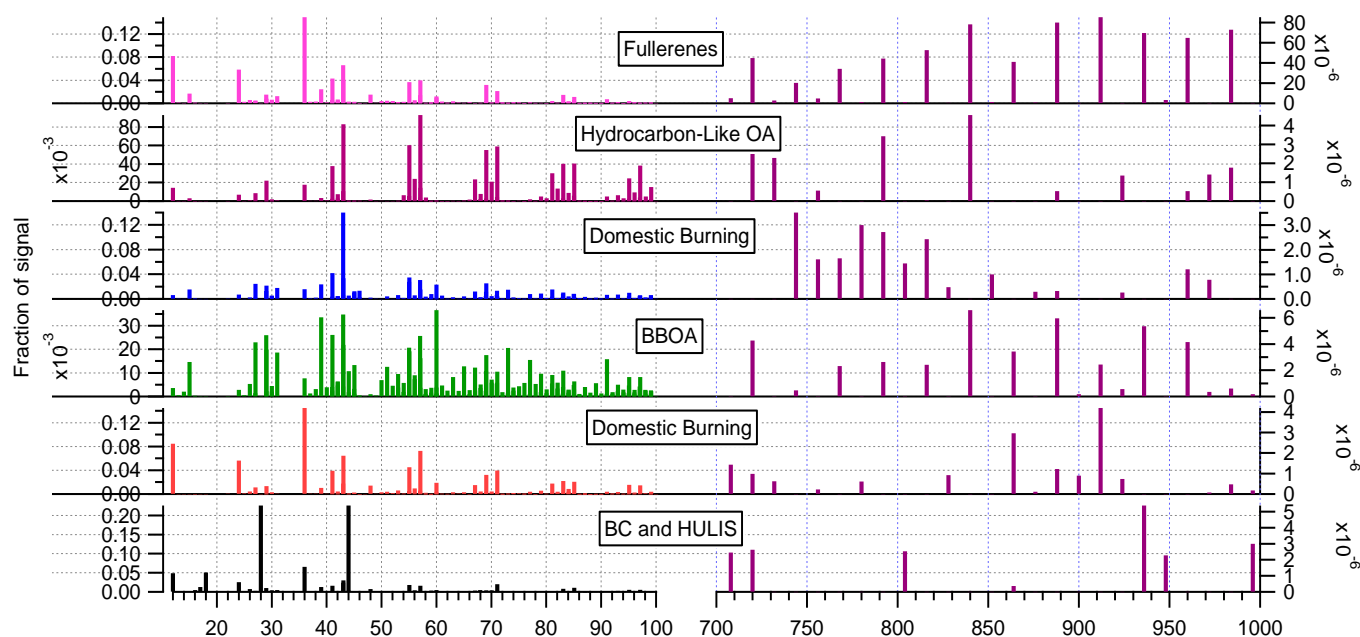

**Figure S2b: Factor profiles of the 6-factor solution in which factor 2 and 4 have the same m/z spectrum, under the condition of 0.10 model error.**

## 9.2 Model Error modification:

Here we use the term ‘model’ error to refer to the additional error term that can be added as part of the PET toolkit, whereby additional error is added proportional to the signal, as opposed to the square root of the signal as is done in the standard AMS error model. In this study, the model error parameter was modified from 0.00, 0.05 and 0.10

by following the recommendations made by Paatero and Hopke (2003). While this is not always done in AMS PMF analysis, this is done here to decrease the signal-to-Noise Ratio (SNR) of the high signals that would otherwise dominate the factorisation. Firstly, the PMF was run with 0.0 model error and Fig. S3a, b depicts that SNR was very high i.e. 1200 SNR for some peaks. For a model error parameter of 0.05, fig. S4a, b shows that SNR was decreased i.e. 18 SNR and improved overall signals of sources, particularly for the fullerenes. For a value of 0.10, the maximum SNR is further reduced to 10 (fig. S5a, b), meaning the error was now dominated by the ‘model error’ term, and this delivered the most satisfactory solution in terms of distinctive mass spectra, particularly for the fullerenes.

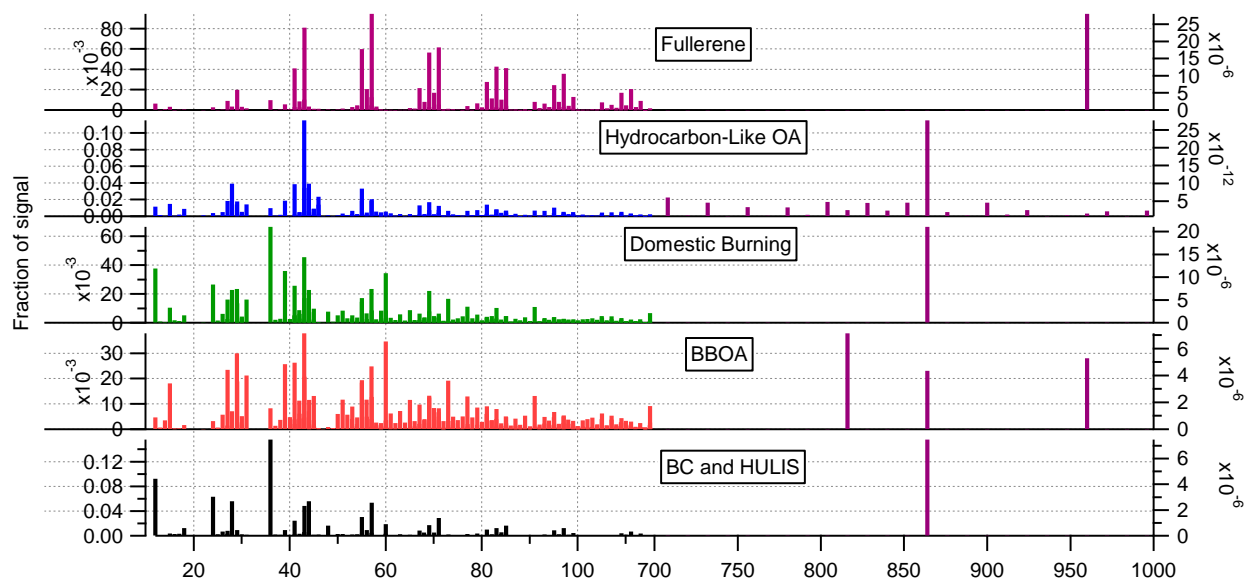

**Fig S3a PMF five factors profile detected by the model error 0.0**

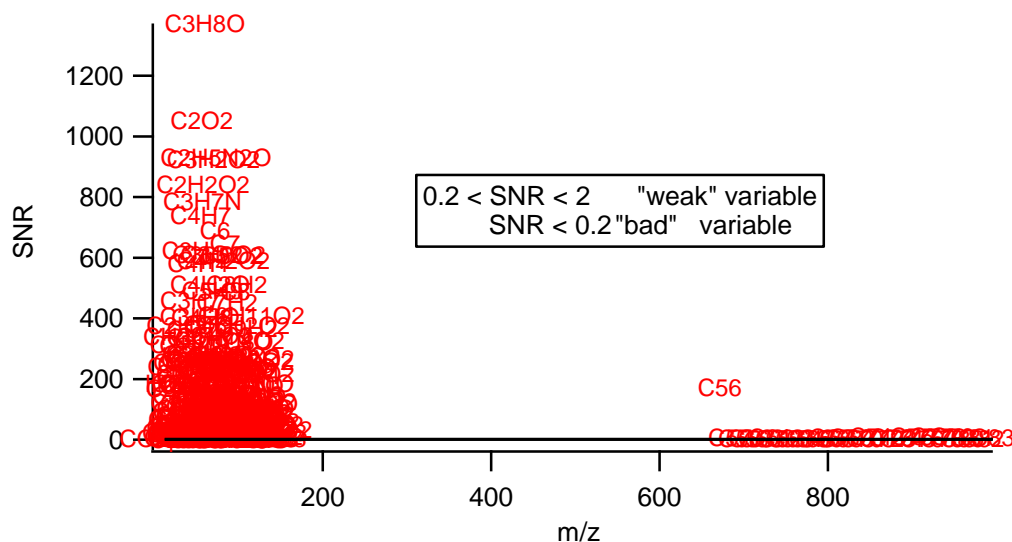

**Figure S3b shows the SNR of organics and fullerenes with no modification in the model error value i.e. 0.00**

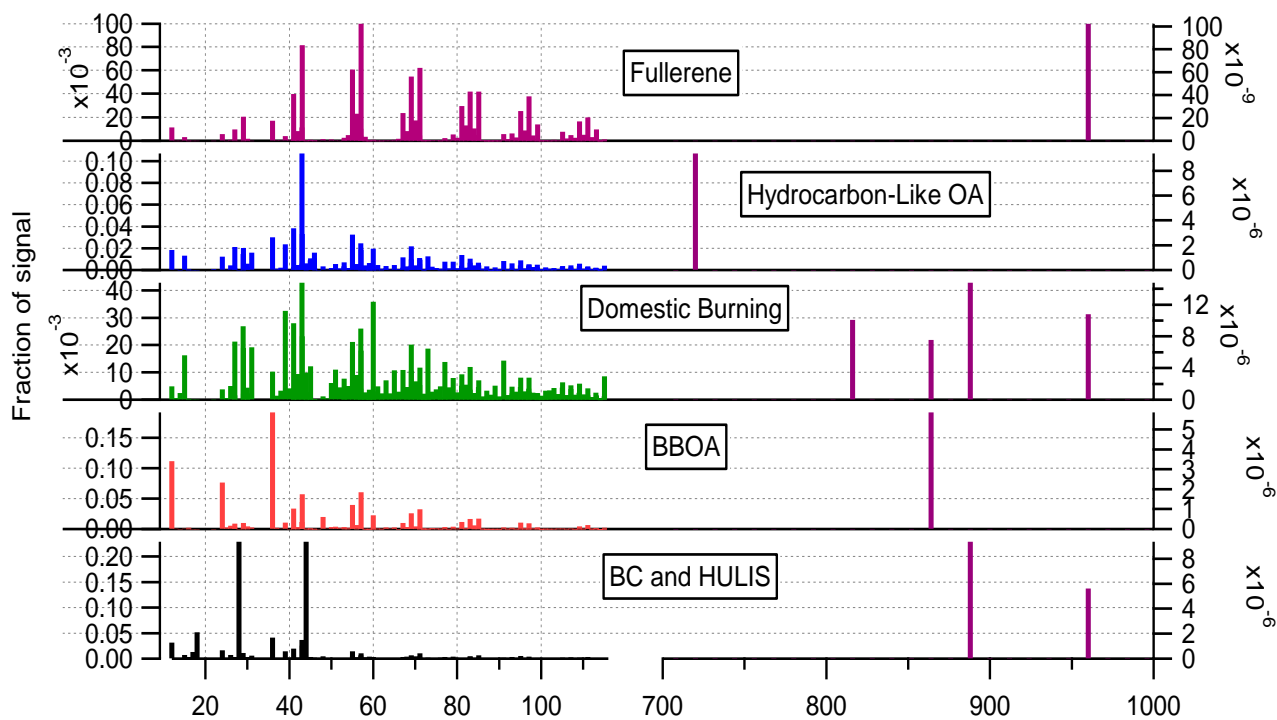

Fig S4a PMF five factors profile detected by the model error 0.05

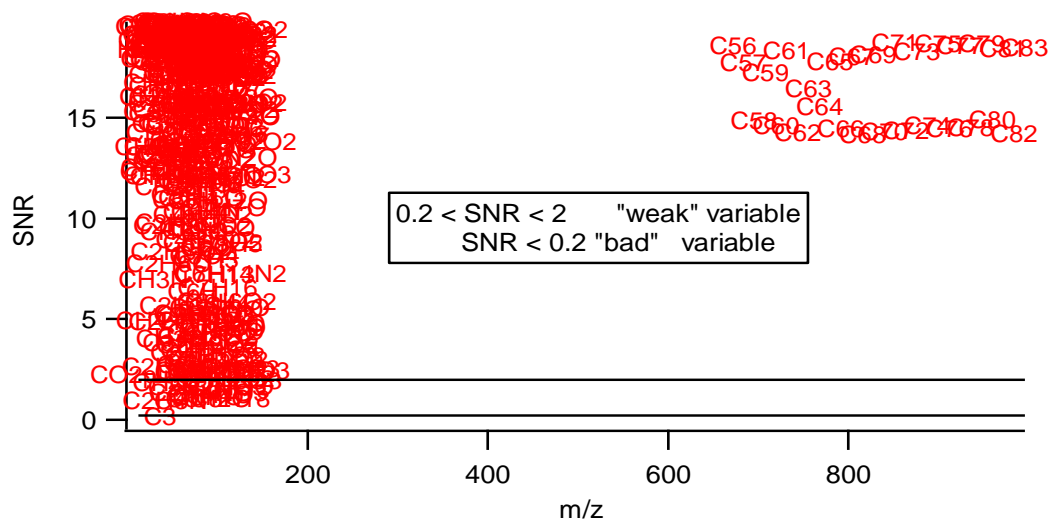

Figure S4b shows the SNR of organics and fullerenes with little modification in the model error value i.e. 0.05

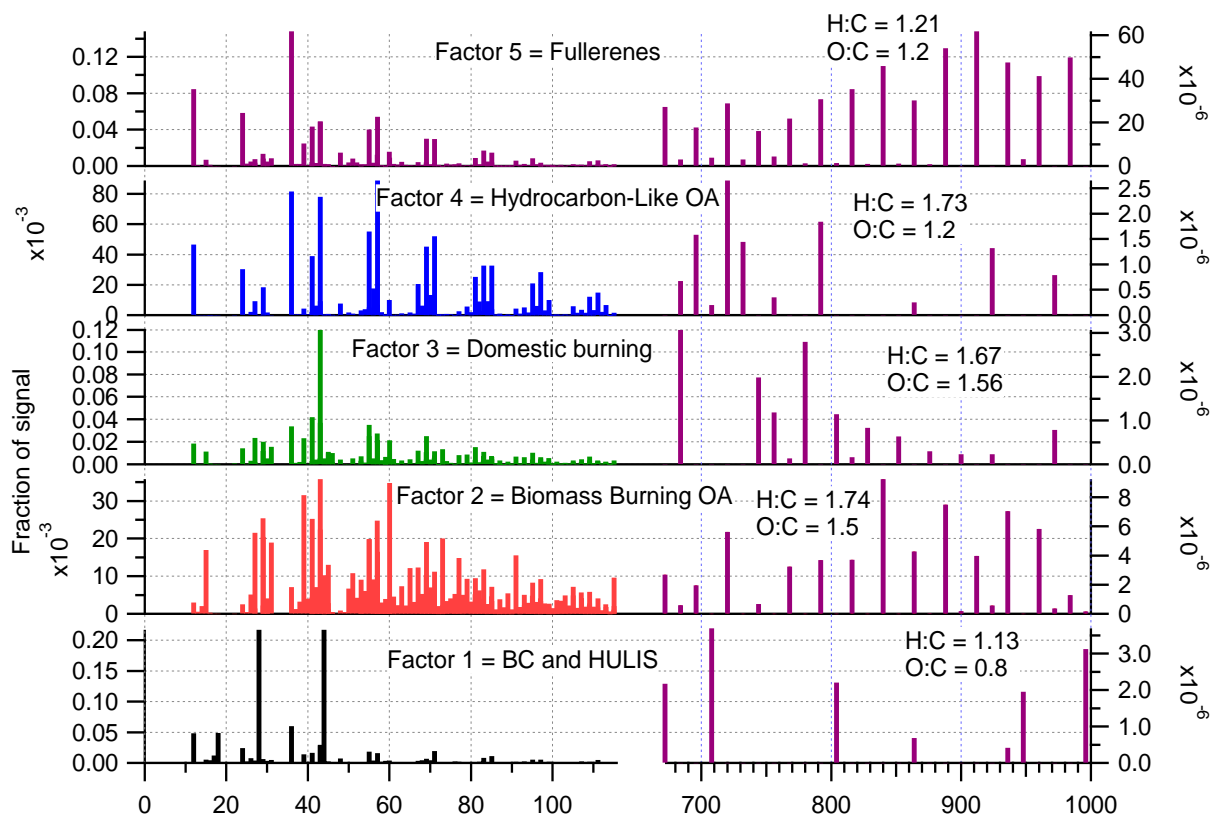

Fig S5a PMF five factors profile detected by the model error 0.10

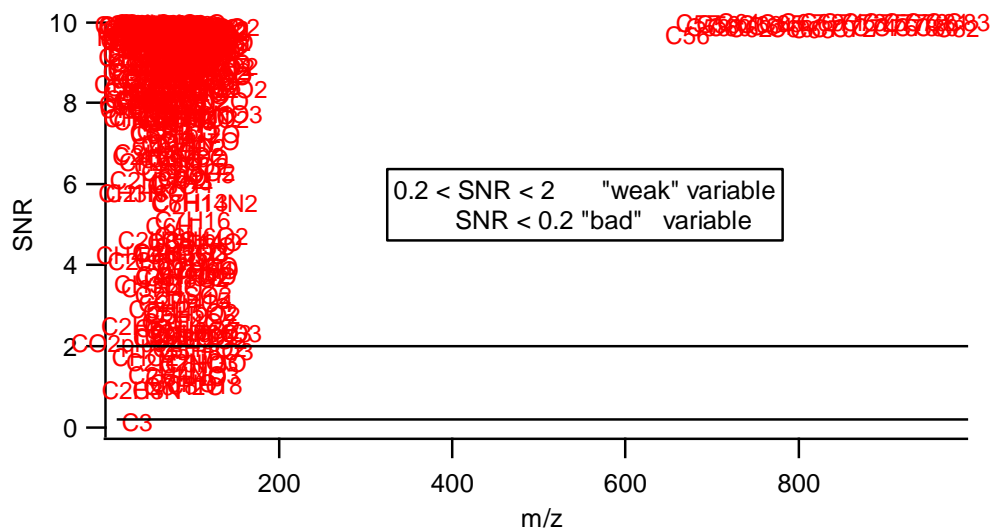

Figure S5b shows the SNR of organics and fullerenes with more modification in the model error value i.e. 0.10.
